# Supplementary material for: Planar heterojunctions for reduced non-radiative open-circuit voltage loss and enhanced stability of organic solar cells
Source: Royal Society of Chemistry journal article supplement (doi:10.1039/d1tc01536b), 2021-01-01
Supplement: d1tc01536b1.pdf [file d1tc01536b1.pdf]

## Supporting Information

### **Planar heterojunctions for reduced non-radiative open-circuit voltage loss and enhanced stability of organic solar cells**

*Yawen Li<sup>1,2</sup>, Yuze Lin<sup>1,2\*</sup>*

<sup>1</sup>Beijing National Laboratory for Molecular Sciences, CAS Key Laboratory of Organic Solids, Institute of Chemistry, Chinese Academy of Sciences, Beijing 100190, China. \*Email: linyz@iccas.ac.cn

<sup>2</sup>University of Chinese Academy of Sciences, Beijing 100049.

## Content

|                                                                          |   |
|--------------------------------------------------------------------------|---|
| <b>Methods</b> .....                                                     | 3 |
| <b>Organic solar cells fabrication and characterization</b> .....        | 3 |
| <b>Measurements</b> .....                                                | 4 |
| <b>Stability test</b> .....                                              | 4 |
| <b>Additional Figures</b> .....                                          | 5 |
| <b>Fig. S1</b> The chemical structures and the energy level diagram..... | 5 |
| <b>Fig. S2</b> The external quantum efficiency (EQE).....                | 6 |
| <b>Fig. S3</b> FTPS-EQE profiles and Normalized EL spectra .....         | 7 |
| <b>Fig. S4</b> Photographs of PHJ devices .....                          | 8 |

## Methods

### Organic solar cells fabrication and characterization

Devices were fabricated with the inverted structure of indium-tin-oxide (ITO)/ZnO/active layer/MoO<sub>3</sub>/Ag. ITO substrates (sheet resistance < 15 Ω sq<sup>-1</sup>) were cleaned in deionized water, acetone, and isopropanol by sonication 3 times (each time for 15 min) subsequently. The clean ITO substrate was pretreated with UV-ozone for 15 mins. The sol-gel film of ZnO interlayer was fabricated by spin-coating of precursor solution onto ITO glass substrates at 4000 rpm for 30 s, and subsequently dried at 200 °C for 30 min in air. The precursor solution was prepared by dissolving 100 mg Zn(CH<sub>3</sub>COO)<sub>2</sub> · 2H<sub>2</sub>O and 28.29 mL ethanolamine in 973 mL 2-methoxyethanol and then stirred overnight. For devices with PHJ configuration, the Y6 solution (6 mg mL<sup>-1</sup> in chloroform) was spin-coated at 2000 rpm for 30 s on the top of ZnO film in nitrogen glove box with thickness of 35 nm. After that, donor materials (Rub and DTDCTB) were deposited through thermal evaporation method under vacuum (*ca.* 10<sup>-5</sup> Pa) on the top of Y6 film at deposition rate of 0.1 nm s<sup>-1</sup> with thickness of 35 nm. Finally, the MoO<sub>3</sub> (3 nm), and a top Ag electrode (100 nm) were sequentially deposited under vacuum (*ca.* 10<sup>-5</sup> Pa). For devices with BHJ configuration, mixture of Rub:Y6 or DTDCTB:Y6 were dissolved in chloroform (1:1, w/w, totally 12 mg mL<sup>-1</sup>) then spin-coated onto ZnO layer through at 2000 rpm for 30 s in nitrogen glove box. The active area of the cells was 0.040 cm<sup>2</sup>.

The *J-V* curves of all devices were employed using an AAA solar simulator (XES-70S1, SAN-EI Electric Co., Ltd) under illumination (AM1.5G, 100 mW cm<sup>-2</sup>) and calibrated with a standard photovoltaic cell equipped with a KG5 filter (certificated by the National Institute of Metrology) and a Keithley 2450 source-measure unit. The thickness of the film was measured *via* the Bruker Dektak-

XT.

## **Measurements**

The UV-vis absorption spectra were recorded on a UH4150 Spectrophotometer and film was fabricated with the same methods of active layers in solar cell devices. Electroluminescence quantum efficiency ( $\text{EQE}_{\text{EL}}$ ) and electroluminescence (EL) measurements were performed by an integrated system (REPS, Enli Technology Co., Ltd.). Fourier-transform photocurrent spectroscopy external quantum efficiency (FTPS-EQE) were obtained on an integrated system (PECT-600, Enli Technology Co., Ltd.), where the photocurrent was amplified and modulated by a lock-in instrument. Trap density of states (tDOS) were performed on Keysight 4980A.

## **Stability test**

For photo-stability test, OSCs were encapsulated in nitrogen atmosphere with a transparent encapsulation glass, fixed by UV-curing adhesives. Then the devices were placed under the LED with power of  $100 \text{ mW cm}^{-2}$  calibrated with an irradiatometer (OHSP-350S, Hangzhou HOPOO Light&Color technology Co., Ltd). The test temperature was the environmental temperature. The photovoltaic parameters were recorded by Keithley 2400 source meter.

## Additional Figures

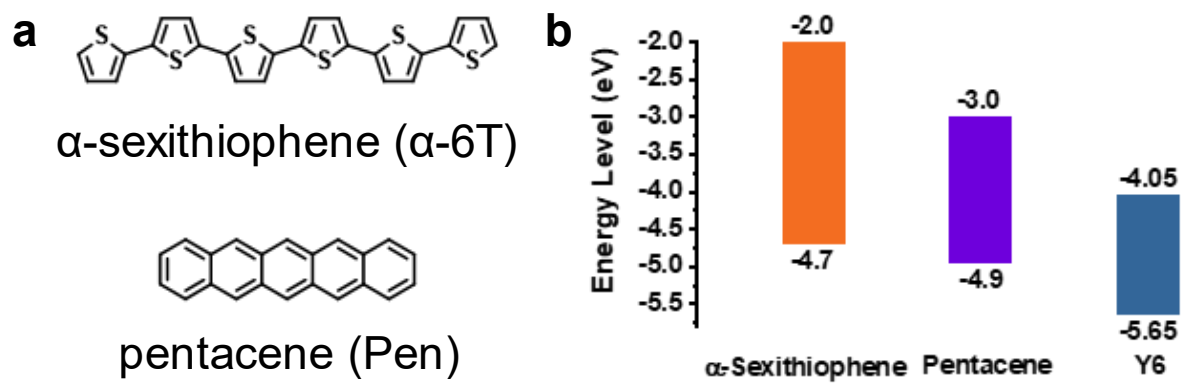

**Fig. S1** (a) The chemical structures of pentacene (Pen) and  $\alpha$ -sexithiophene ( $\alpha$ -6T), (b) The energy level diagram of  $\alpha$ -6T, Pen, and Y6.

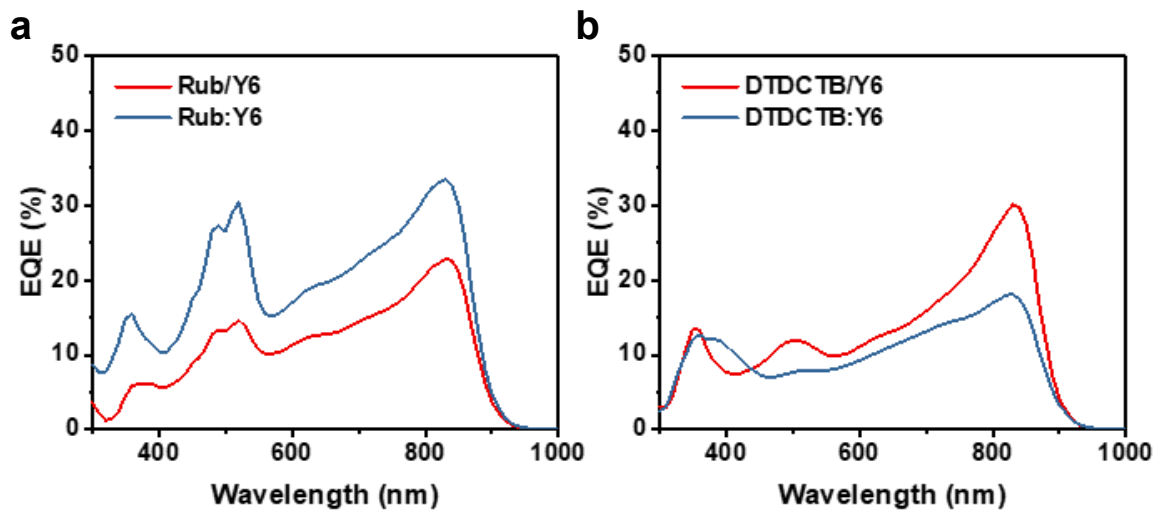

**Fig. S2** The external quantum efficiency (EQE) spectra for (a) Rub and (b) DTDC TB based devices with PHJ and BHJ configurations.

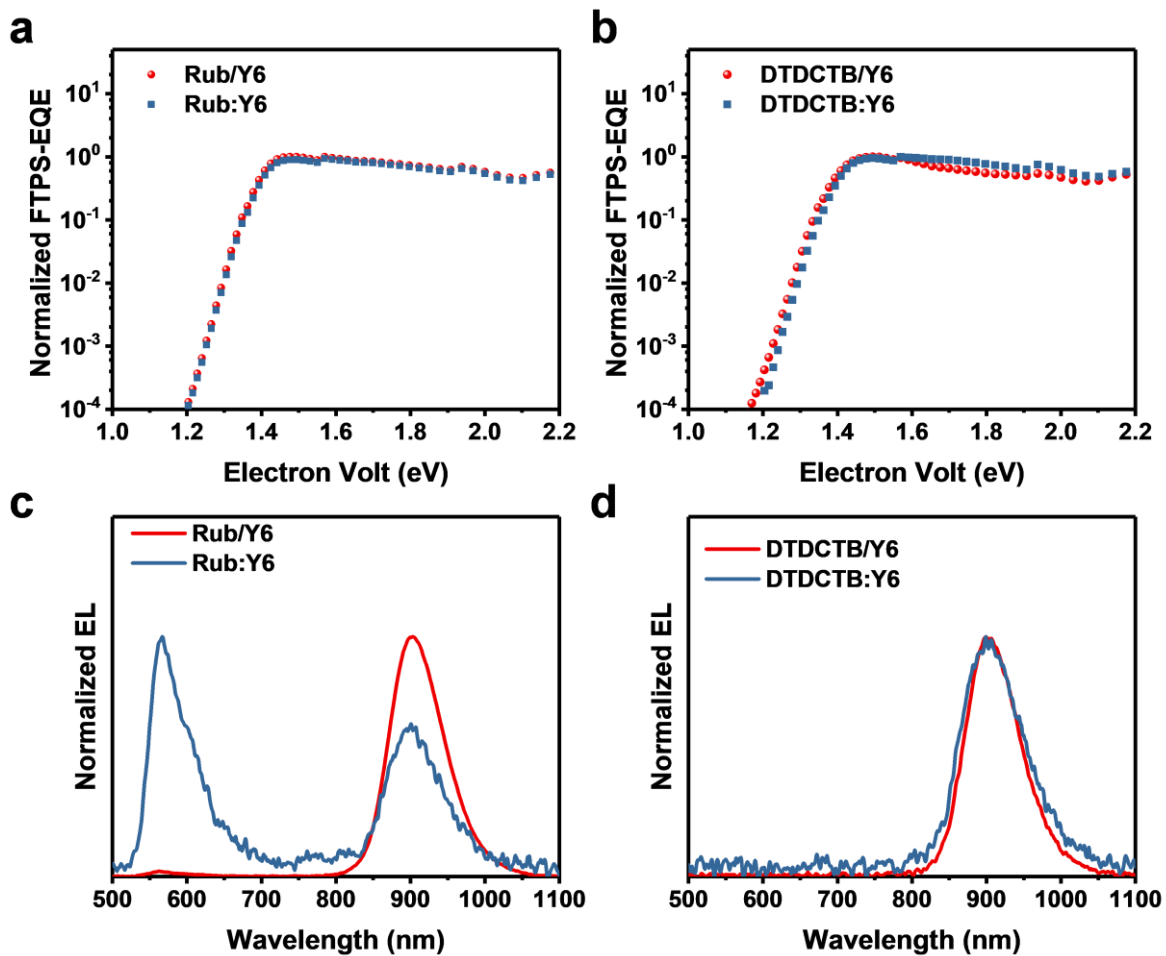

**Fig. S3** FTPS-EQE of (a) Rub-based devices and (b) DTDCTB-based devices with different configurations at the absorption onset. Normalized EL spectra of (c) Rub-based devices and (d) DTDCTB-based devices with different configurations.

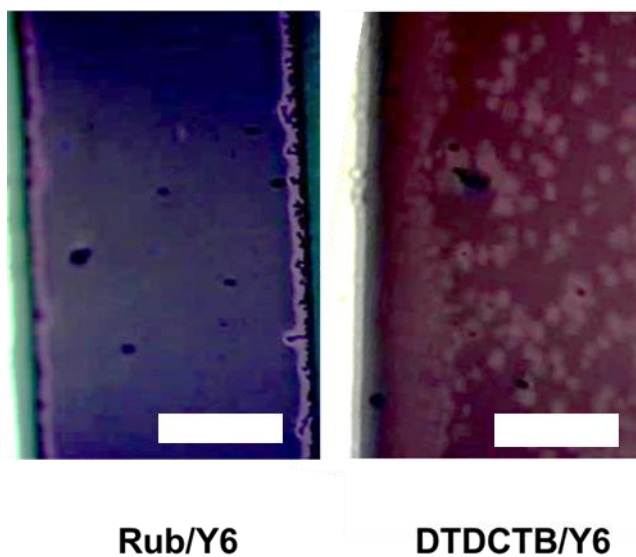

**Fig. S4** The photographs of the PHJ devices based on Rub and DTDCTB after 200 hours irradiation.

Scale bar: 1 mm.
